# Supplementary material for: TCRαβ/CD19 depleted HSCT from an HLA-haploidentical relative to treat children with different nonmalignant disorders
Source: PubMed Central journal article supplement — Blood Adv. 2022 Jan 11;6(1):281–92. doi: 10.1182/bloodadvances.2021005628 (PMC8753220; doi:10.1182/bloodadvances.2021005628), 2022-01-11

## Supplementary Methods

### *Donor Selection*

When both parents (and eventually a HLA-haploidentical sibling > 18 year-old) were eligible for donation, the donor was chosen according to CMV and adenovirus serostatus (i.e., privileging donors with positive serology), as well as to immunological criteria [including, in hierarchical order: i) NK alloreactivity, evaluated according to the killer immunoglobulin-like receptor (KIR)/KIR-Ligand model; ii) KIR B haplotype, iii) higher B-content score and iv) size of NK alloreactive subset].<sup>1-3</sup>

### *Donor mobilization and graft manipulation.*

Donor hematopoietic progenitors were mobilized through subcutaneous administration of 10-12 µg/kg/day granulocyte colony-stimulating factor in 2-3 divided doses from day -5 until day -1 (i.e., the day of leukapheresis). Plerixafor (Mozobil®, Genzyme) was given at a dose of 0.24 mg/kg in case of failure to achieve the cutoff of  $\geq 40$  CD34+ cells/µL and/or with a predicted apheresis yield  $\leq 12 \times 10^6$  CD34+ cells/kg of recipient's body weight.<sup>4</sup> Apheresis was performed with the Spectra Optia® Cell Separator (Terumo BCT, Leuven, Belgium). Graft manipulation procedures were performed with the fully automated CliniMACS® device (Miltenyi Biotec, Bergisch Gladbach, Germany) as already described.<sup>5</sup> Clinical grade reagents, disposable kits, and instrumentation were also from Miltenyi Biotec.

### *Supportive therapy*

All patients received antiviral prophylaxis with acyclovir, antifungal prophylaxis with agents active on both yeast and molds (i.e., liposomal amphotericin B or caspofungin) and prophylaxis against *Pneumocystis jirovecii* pneumonia with cotrimoxazole. G-CSF was not routinely used; it was administered during aplasia only in case of life-threatening bacterial or fungal infections.

### *AAUC<sub>180</sub>*

Time-averaged area-under-the-curve for the first 180 days (AAUC<sub>180</sub>) was used to better report the overall exposure of patients to the viral burden over time and the time of positivity (thus indirectly reflecting the burden of medical care required). AAUC<sub>180</sub> (expressed as log<sub>10</sub> copies\*week/ml whole blood) was calculated for each patient with viremia > 500 (2.69 log<sub>10</sub>) copies/ml whole blood and divided per the number of weeks at risk (i.e., 26 weeks or time to last follow-up or death).

### *Statistical analysis*

Engraftment was defined as time from HSCT to the first of 3 consecutive days with an absolute neutrophil count  $\geq 0.5 \times 10^9$ /L and reported as median and range; platelet recovery was defined as the first of 7 consecutive days with an unsupported platelet count  $\geq 20 \times 10^9$ /L, and reported as median and range.

Competing risks for calculation of cumulative incidences were as follows: i) for GF, death without engraftment; for GVHD (acute and chronic), GF and death without GVHD.

## References

1. Moretta L, Locatelli F, Pende D, Marcenaro E, Mingari MC, Moretta A. Killer Ig-like receptor-mediated control of natural killer cell alloreactivity in haploidentical hematopoietic stem cell transplantation. *Blood*. 2011;117(3):764-771.
2. Pende D, Marcenaro S, Falco M, et al. Anti-leukemia activity of alloreactive NK cells in KIR ligand-mismatched haploidentical HSCT for pediatric patients: evaluation of the functional role of activating KIR and redefinition of inhibitory KIR specificity. *Blood*. 2009;113(13):3119-3129.
3. Meazza R, Falco M, Loiacono F, et al. Phenotypic and Functional Characterization of NK Cells in alpha-beta T-Cell and B-Cell Depleted Haplo-HSCT to Cure Pediatric Patients with Acute Leukemia. *Cancers (Basel)*. 2020;12(8).
4. Merli P, Biagini S, Girolami E, et al. A new BSA-based Threshold Predicts Optimal PBSC Collection in T-cell Depleted HLA-haploidentical Stem Cell Transplantation. *Bone Marrow Transplantation*. 2020;55(SUPPL 1):681-681.
5. Li Pira G, Malaspina D, Girolami E, et al. Selective Depletion of alpha-beta T Cells and B Cells for Human Leukocyte Antigen-Haploidentical Hematopoietic Stem Cell Transplantation. A Three-Year Follow-Up of Procedure Efficiency. *Biol Blood Marrow Transplant*. 2016;22(11):2056-2064.

**Supplementary Table.**

**Supplementary Table 1. Multivariable analysis on factors influencing GF.**

| Variable                    | Hazard ratio | Lower 95%CI | Upper 95%CI | p-value |
|-----------------------------|--------------|-------------|-------------|---------|
| CD34+/kg>20x10E6            | 4.1620       | 0.09699     | 178.6000    | 0.4600  |
| Gender                      | 0.7909       | 0.28980     | 2.1590      | 0.6500  |
| Gender mismatch             | 0.2227       | 0.05121     | 0.9682      | 0.0450  |
| Infections pre-HSCT         | 2.76500      | 0.68990     | 11.080      | 0.1500  |
| Disease at high-risk for GF | 5.6320       | 1.91900     | 16.5300     | 0.0017  |

**Supplementary Table 2. Characteristics of second HSCT.**

| Patients                                   | (n = 18)            | %    |
|--------------------------------------------|---------------------|------|
| Sex                                        |                     |      |
| Male                                       | 11                  | 61   |
| Female                                     | 7                   | 39   |
| Donor characteristics                      |                     |      |
| Age (years)*, median (range)               | 40.5 (24-52)        |      |
| Type of donor                              |                     |      |
| Mother                                     | 13                  | 72   |
| Father                                     | 3                   | 17   |
| mismatched UCBT                            | 2                   | 11   |
| Conditioning regimen used#                 |                     |      |
| Cyclophosphamide+Fludarabine ( $\pm$ TBI§) | 10                  | 55.5 |
| Cytarabine+Fludarabine                     | 5                   | 27.5 |
| Treosulfan+Fludarabine                     | 3                   | 17   |
| Cell dose infused*, median (range)         |                     |      |
| CD34+ cells $\times 10^6$ /kg              | 22.1 (15.8-37.4)    |      |
| $\alpha\beta$ + T cells $\times 10^6$ /kg  | 0.022 (0.002-0.066) |      |
| $\gamma\delta$ + T cells $\times 10^6$ /kg | 12.8 (4.0-38.9)     |      |
| NK cells $\times 10^6$ /kg                 | 44.2 (16.2-116.5)   |      |
| CD20+ cells $\times 10^6$ /kg              | 0.035 (0.003-0.12)  |      |
| Engraftment                                | 16                  | 89   |
| Time to engraftment (days), median (range) | 14 (11-21)          |      |
| Infections                                 |                     |      |
| CMV                                        | 6                   | 33.5 |
| ADV                                        | 5                   | 27   |

|                                                                                   |        |      |
|-----------------------------------------------------------------------------------|--------|------|
| Bacterial                                                                         | 1      | 5.5  |
| Fungal                                                                            | 1      | 5.5  |
|                                                                                   |        |      |
| acute GvHD (grade I)                                                              | 3(/16) | 18.7 |
|                                                                                   |        |      |
| * for haplo HSCT                                                                  |        |      |
| # +ATLG Genzyme® 1.5-2 mg/kg for 2 days (-3,-2) and rituximab 200 mg/sm on day -1 |        |      |
| § single dose 200 cGy                                                             |        |      |

### Figure legends

**Supplementary Figure 1. Engraftment. A.** Kinetics of recovery of neutrophils (green line) and platelets (purple line). **B.** Cumulative incidence of platelet recovery for patients who received a dose of CD34+ cells in the first quartile (i.e.,  $8.5-18 \times 10^6/\text{kg}$ ; blue line) or in the 2<sup>nd</sup>-4<sup>th</sup> quartiles.

**Supplementary Figure 2. Graft failure.** Cumulative incidence of GF according to the presence (red line) or absence (blue line) of gender mismatch.

**Supplementary Figure 3. Chimerism analysis. A.** Pie chart representing chimerism of patients at 1 year after HSCT. **B.** Details on patients with mixed chimerism (percentage of donor chimerism is reported).

**Supplementary Figure 4. Transplant-related mortality.** TRM according to the infectious state at time of transplant. “Recent” infection was defined as having an infection within the month preceding TCR $\alpha\beta$ + /CD19- depleted haploHSCT. Recent/active infection, red line; no infection at time of HSCT, blue line.

**Supplementary Figure 5. Survival: Subgroup analysis on patients with PIDs.** OS according to the type of primary immunodeficiency (i.e., SCID patients versus non-SCID patients).

Supplementary Figure 1

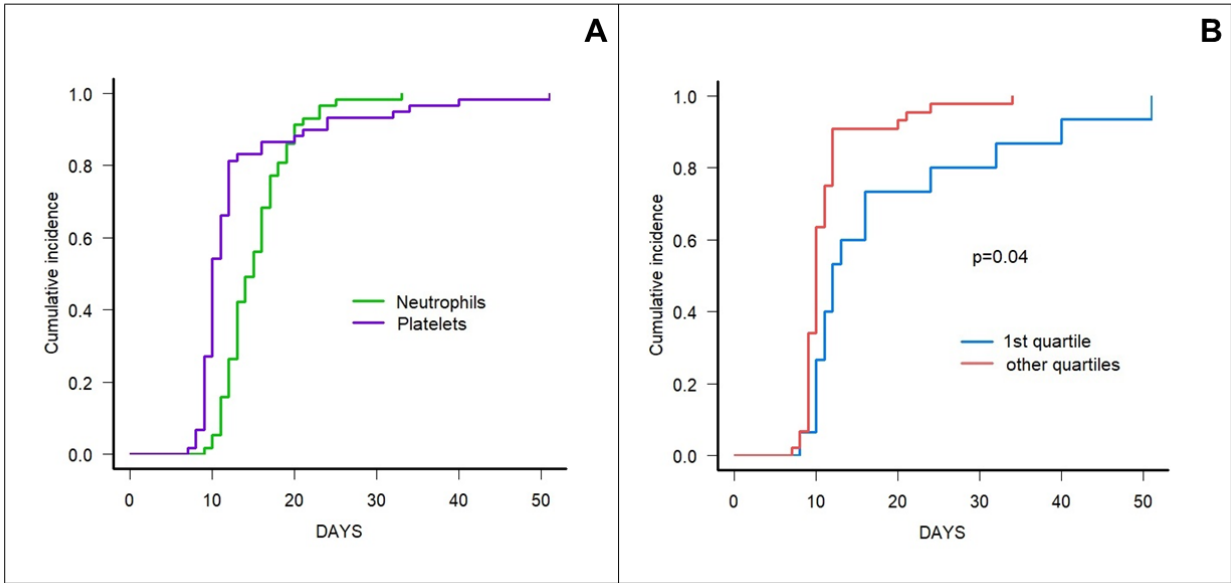

Supplementary Figure 2

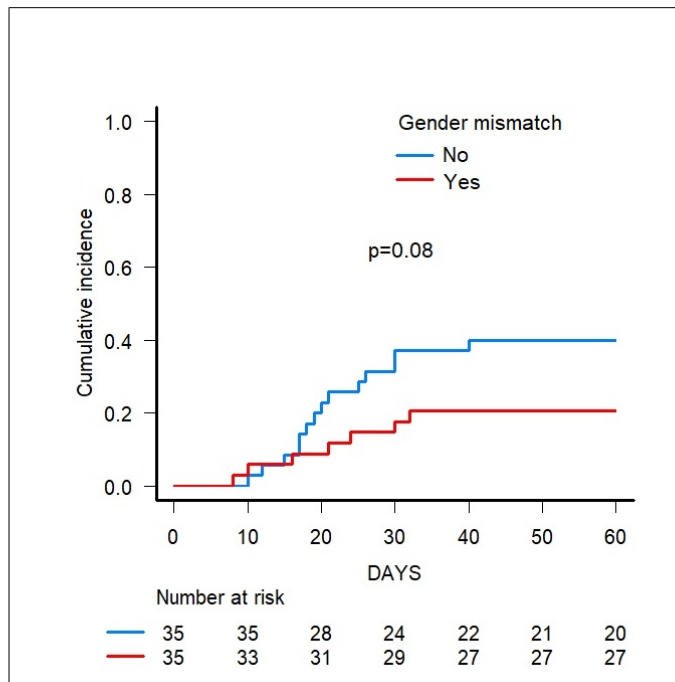

Supplementary Figure 3

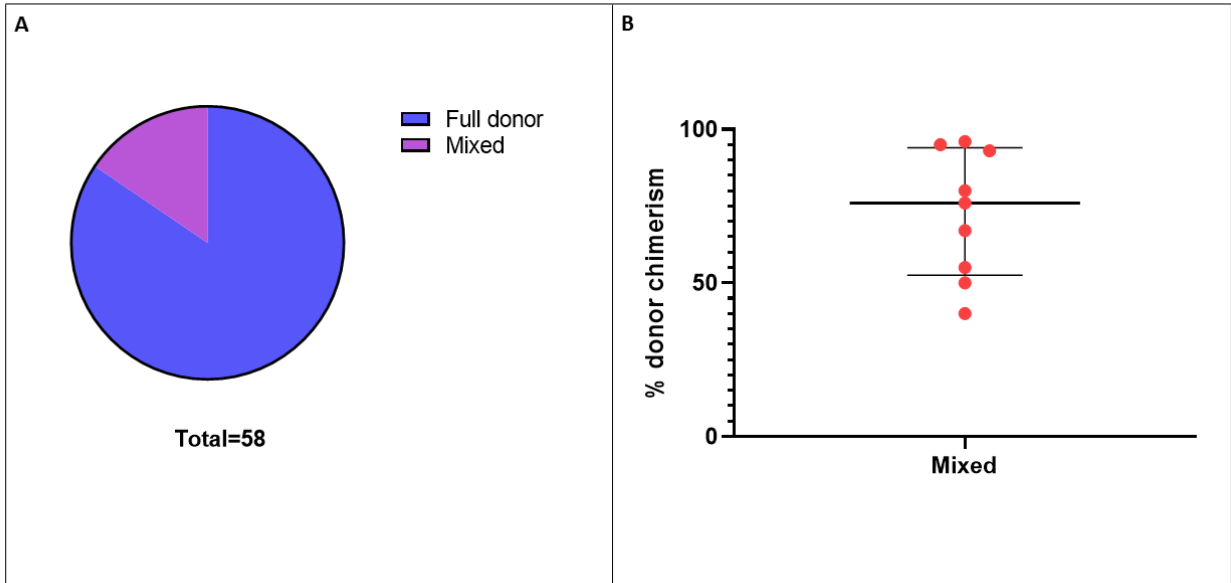

Supplementary Figure 4

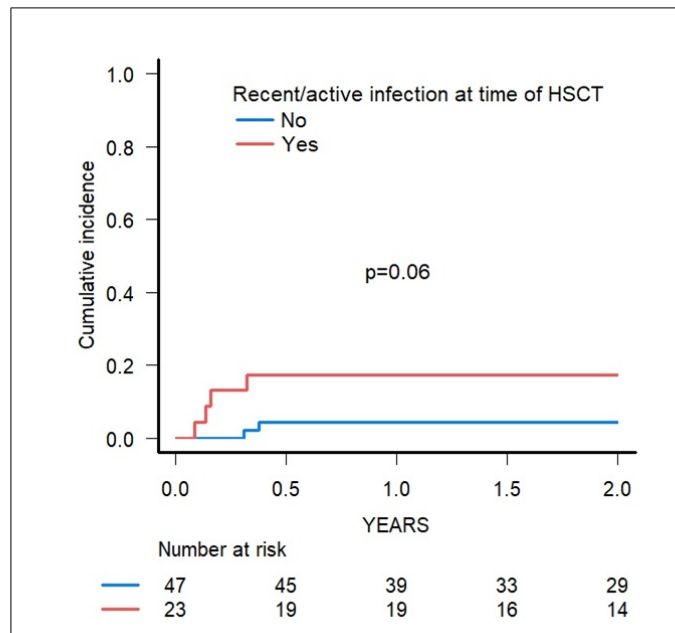

Supplementary Figure 5

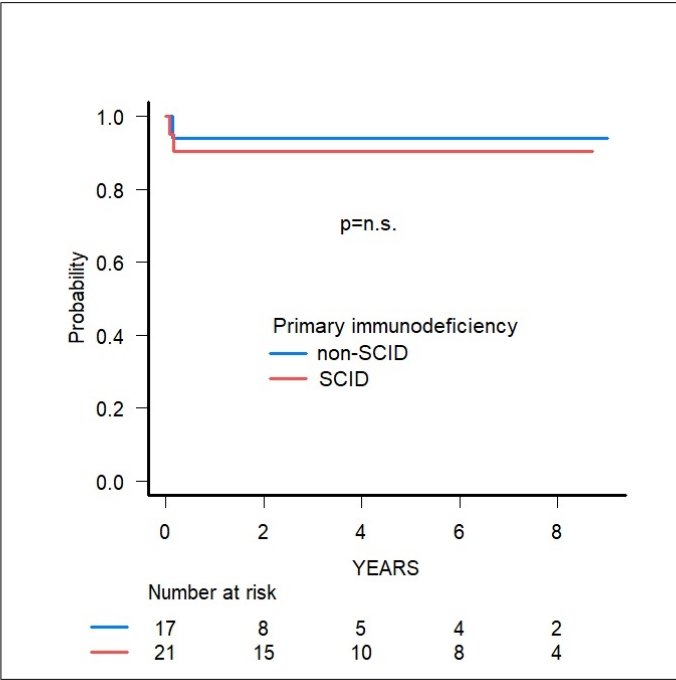

Supplement: advancesADV2021005628-suppl1.pdf [file advancesADV2021005628-suppl1.pdf]
